# Supplementary material for: Pt-based nanoparticles decorated by phosphorus-doped CuWO4 to enhance methanol oxidation activity
Source: Royal Society of Chemistry journal article supplement (doi:10.1039/d1nj01134k), 2021-01-01
Supplement: d1nj01134k1.pdf [file d1nj01134k1.pdf]

**Pt-based nanoparticles decorated by phosphorus-doped  $\text{CuWO}_4$  to enhance methanol oxidation activity**

Taichun Wu, Mengyu Gan\*, Li Ma\*\*, ShuangWei, Qinglan Fu, Yanling Yang, TingTing

Li, Fei Xie, Wang Zhan, Xiujuan Zhong

College of Chemistry & Chemical Engineering, Chongqing University, Chongqing,

400044, PR China

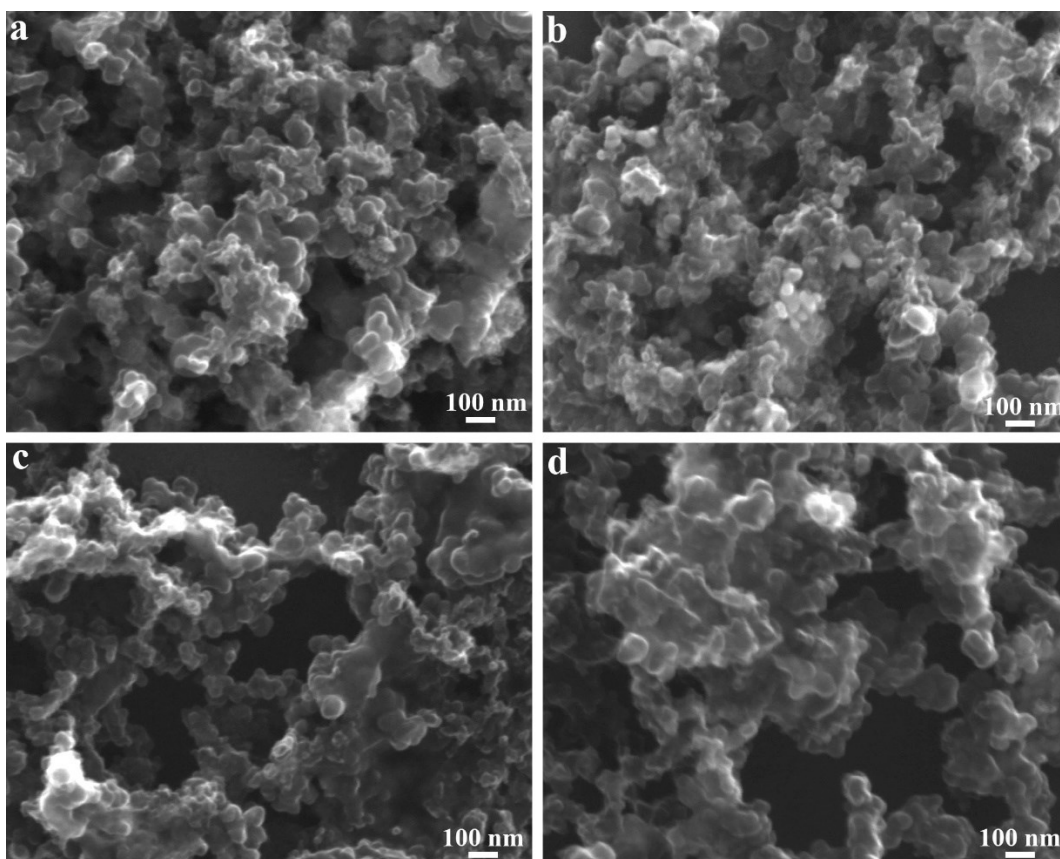

Figure. S1. SEM patterns of  $\text{CuWO}_4 \cdot 2\text{H}_2\text{O}/\text{C}$  (a),  $\text{C}/\text{P-CuWO}_4$  (b) and  $\text{Cu}(\text{OH})_2/\text{C}$  (c),  $\text{C}/\text{P-CuO}$  (d), respectively.

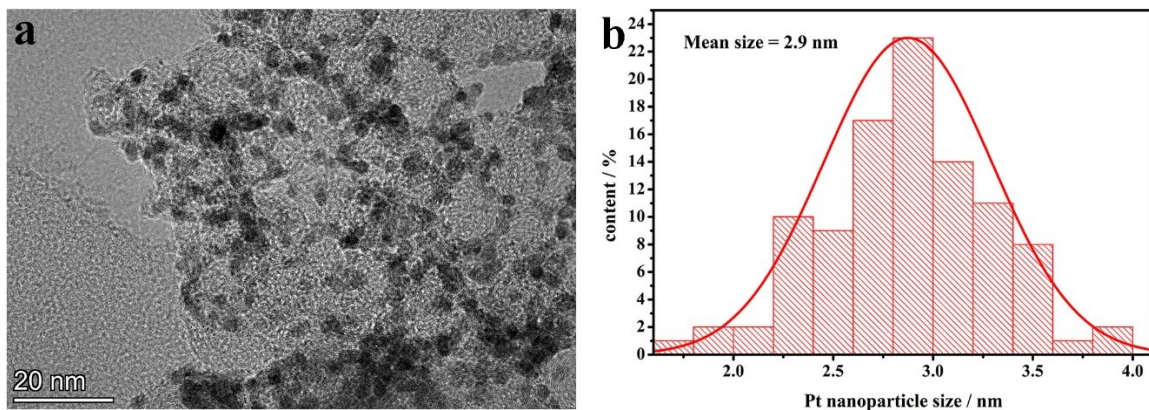

Figure. S2. TEM patterns and mean size of Pt NPs of Pt/C-CuWO<sub>4</sub>

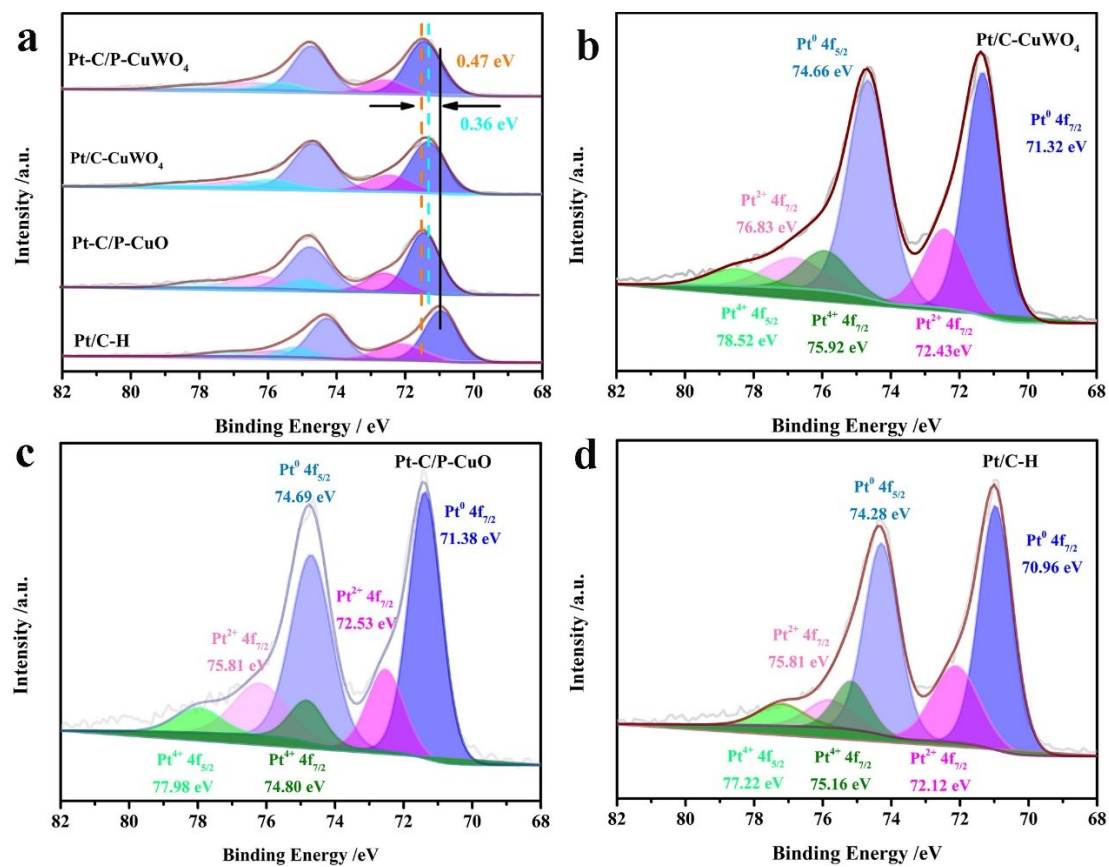

Figure. S3 XPS spectra XPS survey spectra of catalysts (a) and Pt 4f spectra of Pt-C/P-CuWO<sub>4</sub>(b), Pt/C-CuWO<sub>4</sub> (c), Pt-C/P-CuO(d), Pt-C/P-WO<sub>3</sub>(e) and Pt/C-H (f), respectively.

Table S1: The fitting results and surface components of the Pt 4f spectra for catalysts.

| samples                  | Pt <sup>0</sup> |                | Pt <sup>2+</sup> |          | Pt <sup>4+</sup> |          |
|--------------------------|-----------------|----------------|------------------|----------|------------------|----------|
|                          | Binding         | Relative ratio | Binding          | Relative | Binding          | Relative |
|                          | Energy          | %              | Energy           | ratio    | Energy           | ratio    |
|                          | (eV)            |                | (eV)             | %        | (eV)             | %        |
| Pt-C/P-CuWO <sub>4</sub> | 71.43           | 70.30          | 72.67            | 18.5     | 75.72            | 11.2     |
|                          | 74.81           |                | 76.51            |          | 78.26            |          |
| Pt/C-CuWO <sub>4</sub>   | 71.32           | 68.06          | 72.43            | 20.6     | 75.92            | 11.34    |
|                          | 74.66           |                | 76.83            |          | 78.52            |          |
| Pt-C/P-CuO               | 71.38           | 66.08          | 72.53            | 23.25    | 74.80            | 10.68    |
|                          | 74.69           |                | 76.20            |          | 77.98            |          |
| Pt/C-H                   | 70.96           | 66.24          | 72.12            | 21.39    | 75.81            | 12.37    |
|                          | 74.28           |                | 75.16            |          | 77.22            |          |

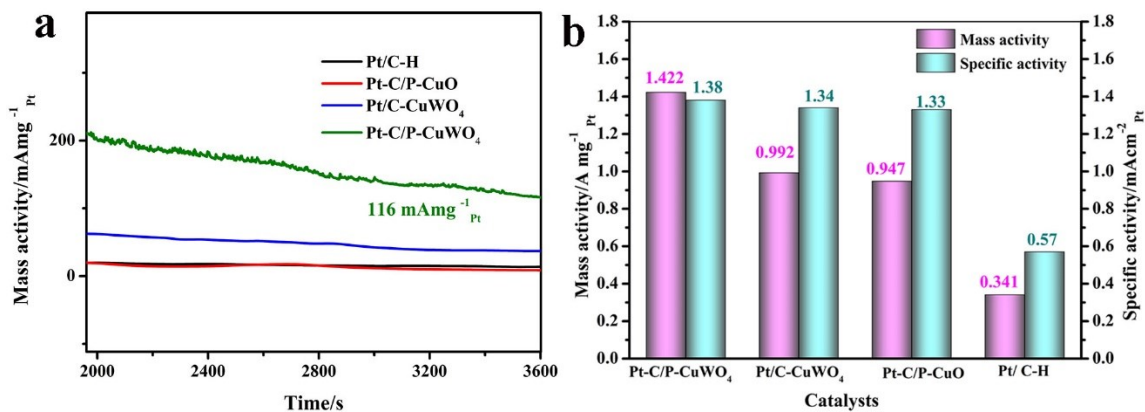

Figure. S4 Chronoamperometric curves of Pt-C/P@CuWO<sub>4</sub>/C, Pt/C-CuWO<sub>4</sub>, Pt-C/P-CuO and Pt/C-H catalysts in 0.5 M H<sub>2</sub>SO<sub>4</sub> solution at a scan rate of 50 mV s<sup>-1</sup> (a), the mass activity and specific activity (b).

Table S2: Electro-chemic values in 0.5 M H<sub>2</sub>SO<sub>4</sub> solution of four samples toward electrochemical active surface area (ECSA)

| samples                  | ECSA<br>(m <sup>2</sup> ·g <sup>-1</sup> <sub>Pt</sub> ) | Specific activity<br>(mA·cm <sup>-2</sup> <sub>Pt</sub> ) | Mass activity<br>(mA·mg <sup>-1</sup> <sub>Pt</sub> ) |
|--------------------------|----------------------------------------------------------|-----------------------------------------------------------|-------------------------------------------------------|
| Pt-C/P-CuWO <sub>4</sub> | 103.28                                                   | 1.38                                                      | 1422                                                  |
| Pt/C-CuWO <sub>4</sub>   | 73.87                                                    | 1.34                                                      | 992                                                   |
| Pt-C/P-CuO               | 71.13                                                    | 1.33                                                      | 947                                                   |
| Pt/C-H                   | 59.70                                                    | 0.57                                                      | 341                                                   |

Table S3: summarized this work and other reported accomplishments in methanol oxidation reaction.

| <b>samples</b>                         | <b>ECSA<br/>(<math>\text{m}^2 \cdot \text{g}^{-1} \text{Pt}</math>)</b> | <b>Mass activity<br/>(<math>\text{mA} \cdot \text{mg}^{-1} \text{Pt}</math>)</b> | <b>Conditions</b>                                                 | <b>References</b> |
|----------------------------------------|-------------------------------------------------------------------------|----------------------------------------------------------------------------------|-------------------------------------------------------------------|-------------------|
| Pt-C/P-CuWO <sub>4</sub>               | 103.28                                                                  | 1422                                                                             | 0.5 M H <sub>2</sub> SO <sub>4</sub> +1.0 M<br>CH <sub>3</sub> OH | This work         |
| Pt-WO <sub>2</sub> /WO <sub>3</sub>    | -                                                                       | 694                                                                              | 0.5 M H <sub>2</sub> SO <sub>4</sub> +1.0 M<br>CH <sub>3</sub> OH | 1                 |
| Pt/Fe <sub>3</sub> O <sub>4</sub> -SNG | 162.06                                                                  | 1129                                                                             | 0.5 M H <sub>2</sub> SO <sub>4</sub> +0.5 M<br>CH <sub>3</sub> OH | 2                 |
| Pt/NiCoP <sub>x</sub> @NCNT-NG         | 54.2                                                                    | 857                                                                              | 0.5 M H <sub>2</sub> SO <sub>4</sub> +0.5 M<br>CH <sub>3</sub> OH | 3                 |
| PtPdNiP TOMNs                          | 57.1                                                                    | 1040                                                                             | 0.5 M H <sub>2</sub> SO <sub>4</sub> +1.0 M<br>H <sub>3</sub> OH  | 4                 |
| Pt/TiO <sub>2</sub> /NDC               | 36.3                                                                    | 527                                                                              | 0.5 M HClO <sub>4</sub> +1.0 M<br>CH <sub>3</sub> OH              | 5                 |

## References

1. Y. Zhou, X. C. Hu, X. H. Liu and H. R. Wen, *Chemical Communications*, 2015, **51**, 15297-15299.
2. J. Zhong, L. Wu, J. Lan, M. Waqas, M. Sun, Y. Fan, W. Chen, L. Liu and J. Yang, *International Journal of Hydrogen Energy*, 2020, **45**, 22929-22937.
3. J. Ding, W. Hu, L. Ma, M. Gan, F. Xie, W. Zhan and W. Lu, *Journal of Power Sources*, 2021, **481**, 228888.
4. Q. Zhou, J. Wu, Z. Pan, X. Kong, Z. Cui, D. Wu and G. Hu, *International Journal of Hydrogen Energy*, 2020, **45**, 33634-33640.
5. J. Zhang, J. Chen, F. Zhou, X. W. Zeng, A. Xing, B. Jia, B. Y. Fan, J. Wang and X. Y. Liu, *Journal of Electrochemical Energy Conversion and Storage*, 2021, **18**.
